# Supplementary material
Source: publisher figshare collection journal article supplement (https://tandf.figshare.com/articles/dataset/_/3998448)
Supplement: Supplementary file 2 [file 1]

**SUPPLEMENTAL DATA 2.** Character-taxon matrix used for phylogenetic analysis.

A NEW GINGLYMODI (ACTINOPTERYGII, HOLOSTEI) FROM THE LATE JURASSIC – EARLY CRETACEOUS OF THAILAND, WITH COMMENTS ON THE EARLY DIVERSIFICATION OF LEPISTOSTEIFORMES IN SOUTHEAST ASIA

UTHUMPORN DEESRI\*, PRATUENG JINTASAKUL and LIONEL CAVIN

[illegible]

\* Corresponding author
